# Supplementary material for: A Comparative Phylogeography of Three Marine Species with Different PLD Modes Reveals Two Genetic Breaks across the Southern Caribbean Sea
Source: MDPI journal article supplement (doi:10.3390/ani13152528), 2023-08-05
Supplement: s1 [file s1]

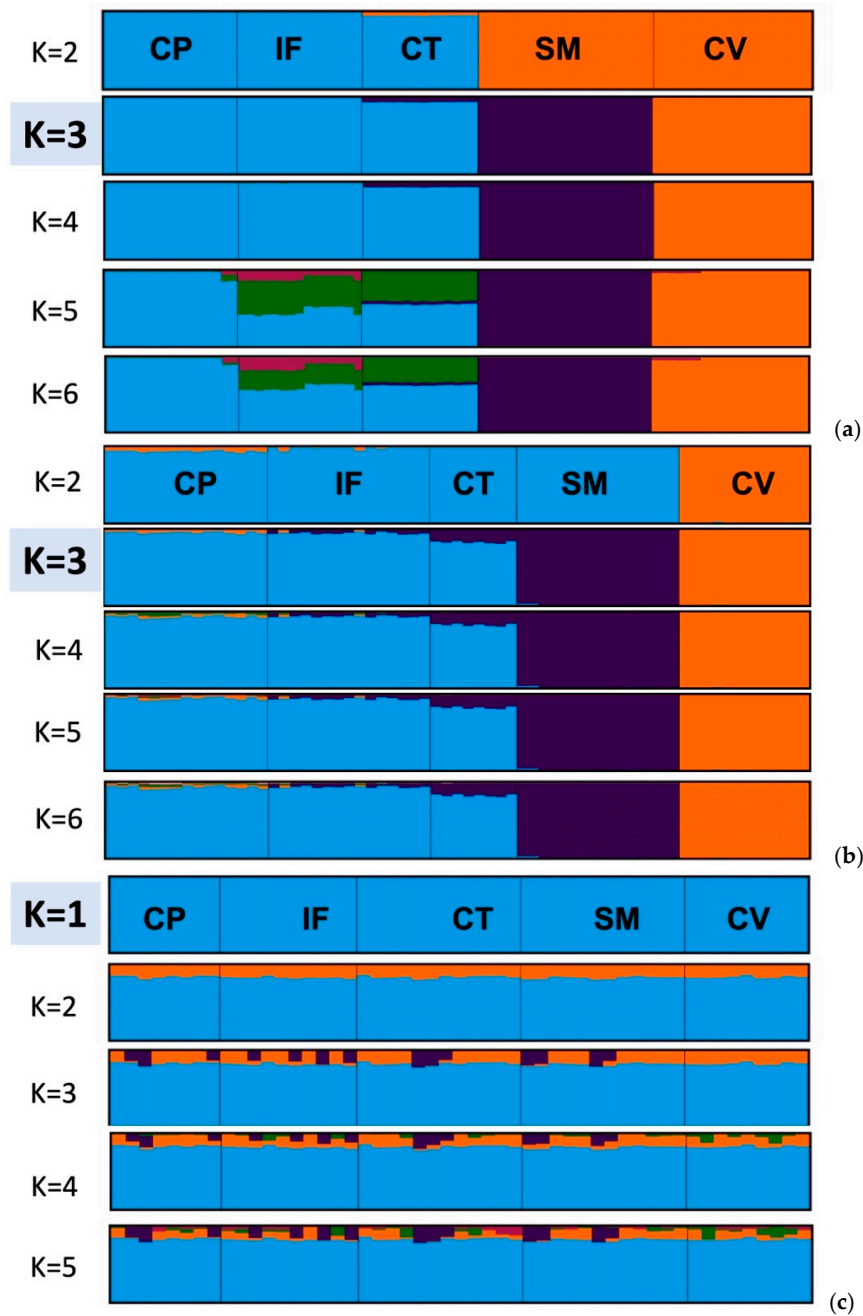

**Figure S1.** Bar graphs of the population ancestry coefficient from the STRUCTURE program indicating the probable number of populations (K = 2-6) for each species: (a) *Acanthemblemaria rivasi*, (b) *Cittarium pica*, and (c) *Nerita tessellata*.

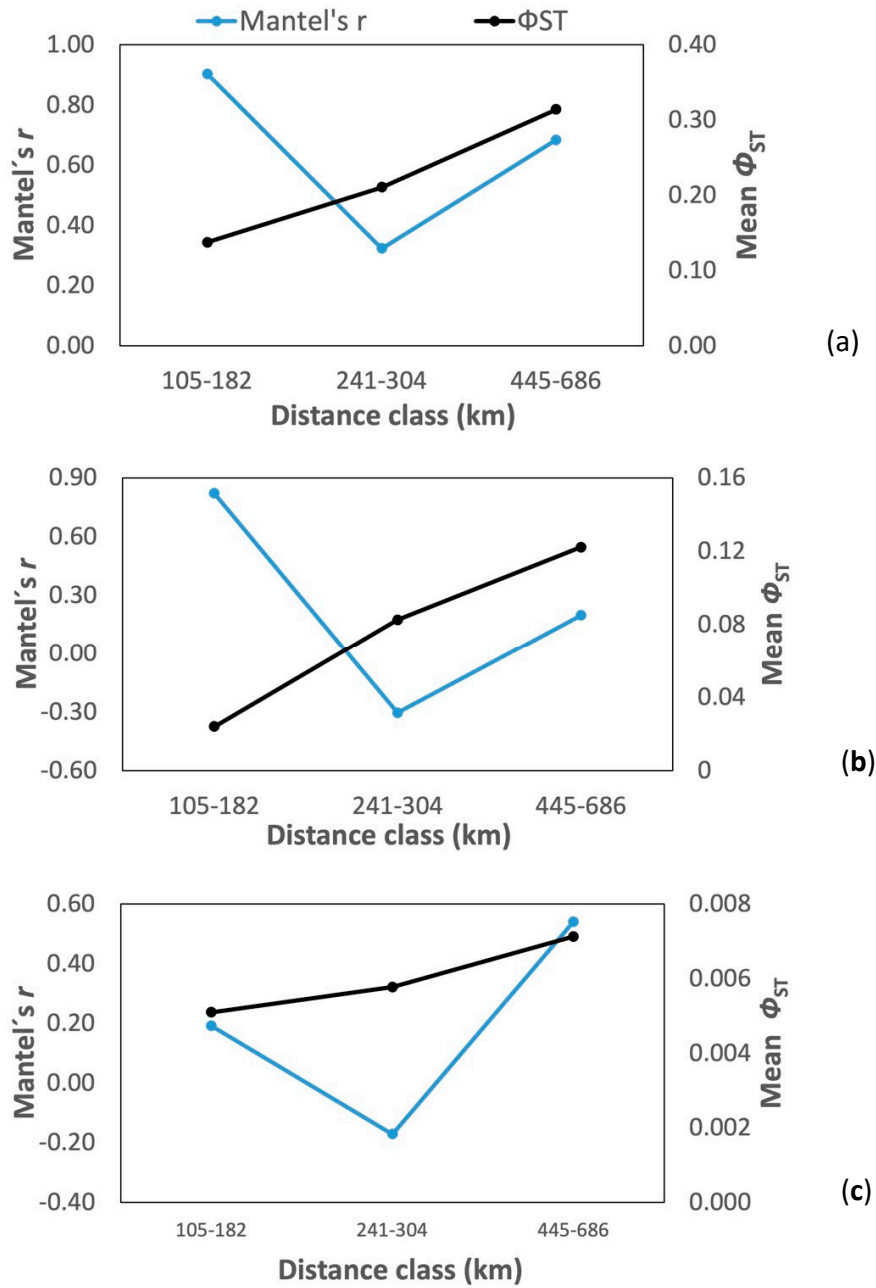

**Figure S2.** Correlogram plots of correlation coefficients and averages of estimated  $\Phi_{ST}$  at each linear geographic distance class mark (right) for (a) *Acanthemblemaria rivasi*, (b) *Cittarium pica*, and (c) *Nerita tessellata*.

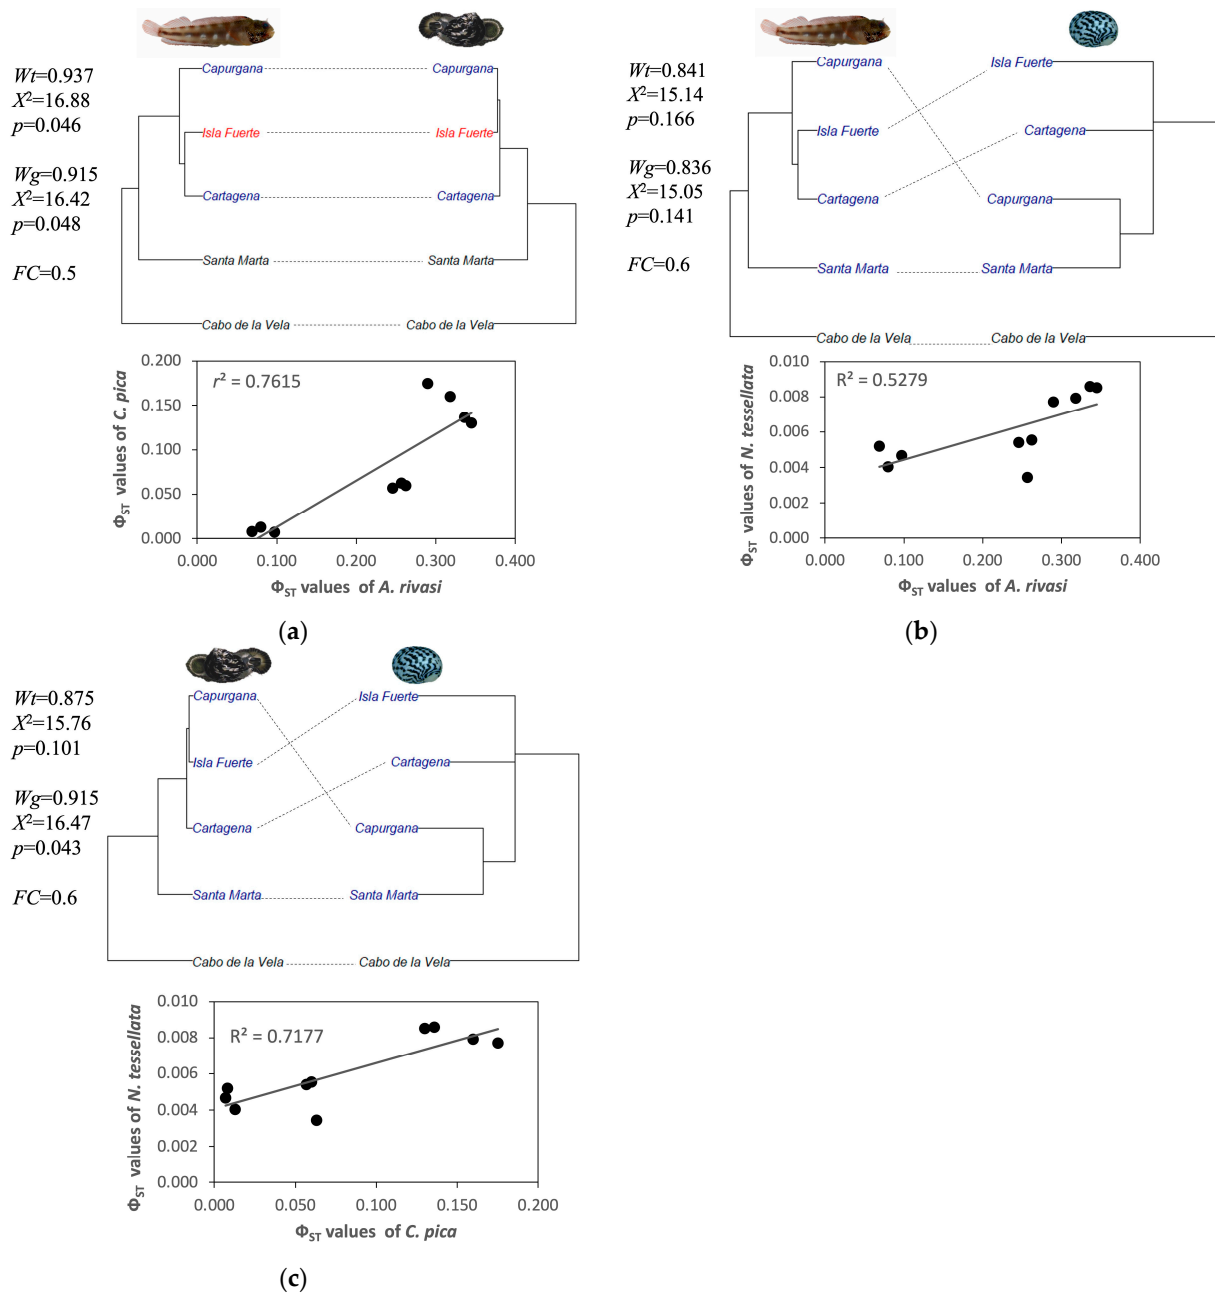

**Figure S3.** Dendrograms of  $\Phi_{ST}$  values constructed with the UPGMA method for *A. rivasi*, *C. pica* and *N. tessellata*, and spatial autocorrelation analysis between the  $\Phi_{ST}$  matrices relating the localities across the southern Caribbean, Colombia sector. (a) Analysis between *A. rivasi* and *C. pica*; (b) *A. rivasi* and *N. tessellata*; (c) *C. pica* and *N. tessellata*. FC = topological concordance factor; W = Kendall's statistic for topological (Wt) and genetic (Wg) congruence;  $rm$  = Mantel correlation coefficient;  $p$  = significance level. The black, blue, and red colors of the site names indicate high, medium, and low concordance among their locations in the dendrograms.

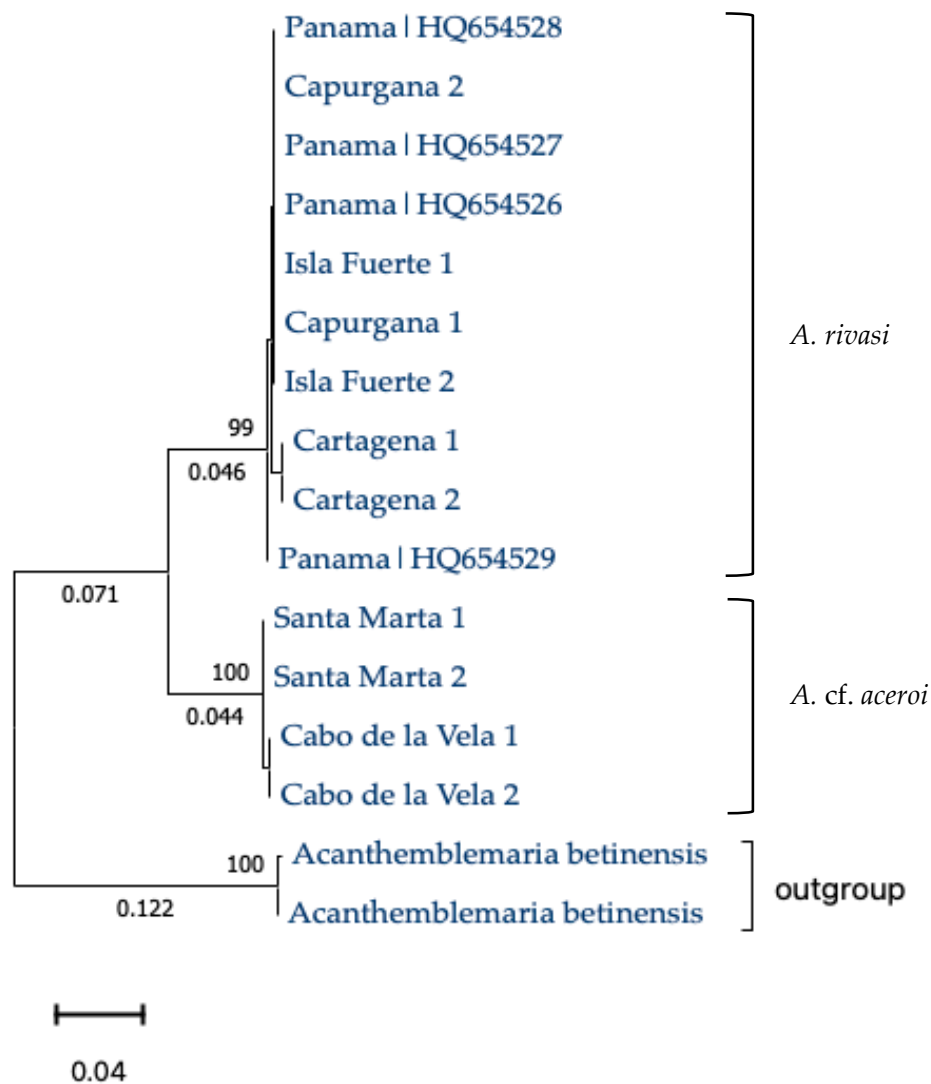

**Figure S4.** The phylogenetic analysis between COI gene sequences of samples from Colombian localities and Panama (*A. rivasi*). The analysis was inferred by using the Maximum Likelihood method and Hasegawa-Kishino-Yano model, with 1000 bootstrap replicates with the program MEGA XI. The length of branches and percentage of trees in which the associated samples clustered together is shown below and above the branches, respectively. The Panamanian samples were downloaded from GenBank with accession numbers: HQ654526.1, HQ654527.1, HQ654528.1, and HQ654529.1. The primers and PCR conditions for sequencing analysis were based on Ward et al. (2005).

**Table S1.** The genetic diversity indices calculated for *Acanthemblemaria rivasi*, *Cittarium pica*, and *Nerita tessellata* in five localities distributed across the southern Caribbean Sea, Colombia sector. Num: number of alleles, Eff\_num: effective number of alleles, Ho: observed heterozygosity, Hs: heterozygosity within populations, and Gis: inbreeding coefficient. SD: standard deviation.

| <i>Acanthemblemaria rivasi</i> |                   |       |         |       |       |        |
|--------------------------------|-------------------|-------|---------|-------|-------|--------|
| Localities                     | Number of samples | Num   | Eff_num | Ho    | Hs    | Gis    |
| Cabo de la Vela                | 19                | 1,222 | 1,097   | 0.063 | 0.062 | -0.009 |
| Santa Marta                    | 21                | 1,404 | 1,206   | 0.121 | 0.129 | 0.069  |
| Cartagena                      | 14                | 1,537 | 1,211   | 0.132 | 0.141 | 0.066  |
| Isla Fuerte                    | 15                | 1,521 | 1,225   | 0.145 | 0.147 | 0.017  |
| Capurganá                      | 16                | 1,449 | 1,169   | 0.106 | 0.113 | 0.061  |
|                                | Global value      | 2,000 | 1,243   | 0.163 | 0.181 | 0.045  |
|                                | SD                | 0     | 0.001   | 0.001 | 0.001 | 0.001  |
| <i>Cittarium pica</i>          |                   |       |         |       |       |        |
| Localities                     | Number of samples | Num   | Eff_num | Ho    | Hs    | Gis    |
| Cabo de la Vela                | 12                | 1,437 | 1,220   | 0.131 | 0.141 | 0.073  |
| Santa Marta                    | 15                | 1,629 | 1,282   | 0.165 | 0.182 | 0.097  |
| Cartagena                      | 8                 | 1,632 | 1,283   | 0.170 | 0.193 | 0.120  |
| Isla Fuerte                    | 15                | 1,766 | 1,293   | 0.173 | 0.195 | 0.117  |
| Capurganá                      | 15                | 1,764 | 1,293   | 0.177 | 0.195 | 0.095  |
|                                | Global value      | 2,000 | 1,243   | 0.163 | 0.181 | 0.102  |
|                                | SD                | 0     | 0.001   | 0.001 | 0.001 | 0.001  |
| <i>Nerita tessellata</i>       |                   |       |         |       |       |        |
| Localities                     | Number of samples | Num   | Eff_num | Ho    | Hs    | Gis    |
| Punta Gallinas                 | 9                 | 1,603 | 1,225   | 0.138 | 0.159 | 0.134  |
| Santa Marta                    | 12                | 1,702 | 1,232   | 0.141 | 0.162 | 0.130  |
| Cartagena                      | 12                | 1,666 | 1,226   | 0.139 | 0.159 | 0.127  |
| Isla Fuerte                    | 10                | 1,644 | 1,230   | 0.140 | 0.162 | 0.140  |
| Capurganá                      | 8                 | 1,541 | 1,219   | 0.136 | 0.156 | 0.127  |
|                                | Global value      | 2,000 | 1,213   | 0.139 | 0.16  | 0.131  |
|                                | SD                | 0     | 0.002   | 0.001 | 0.001 | 0.002  |

**Table S2.** Estimates of evolutionary divergence between Panamanian COI sequences of *Acanthemblemaria rivasi* and Colombian localities, which were conducted using the Kimura 2-parameter model and 1000 bootstrap replicates with the program MEGA XI.

| Localities/species                       | <i>A. cf. aceroi</i> |             | <i>A. rivasi</i> |             |           |          |          |          |
|------------------------------------------|----------------------|-------------|------------------|-------------|-----------|----------|----------|----------|
|                                          | Cabo de la Vela      | Santa Marta | Cartagena        | Isla Fuerte | Capurganá | HQ654527 | HQ654528 | HQ654529 |
| Cabo de la Vela ( <i>A. cf. aceroi</i> ) | 0                    |             |                  |             |           |          |          |          |
| Santa Marta ( <i>A. cf. aceroi</i> )     | 0.003                | 0           |                  |             |           |          |          |          |
| Cartagena ( <i>A. rivasi</i> )           | 0.102                | 0.098       | 0                |             |           |          |          |          |
| Isla Fuerte ( <i>A. rivasi</i> )         | 0.096                | 0.092       | 0.005            | 0           |           |          |          |          |
| Capurganá ( <i>A. rivasi</i> )           | 0.096                | 0.092       | 0.005            | 0.000       | 0         |          |          |          |
| HQ654527 ( <i>A. rivasi</i> )            | 0.096                | 0.092       | 0.005            | 0.000       | 0.000     | 0        |          |          |
| HQ654528 ( <i>A. rivasi</i> )            | 0.097                | 0.093       | 0.005            | 0.000       | 0.000     | 0.000    | 0        |          |
| HQ654529 ( <i>A. rivasi</i> )            | 0.094                | 0.090       | 0.007            | 0.002       | 0.002     | 0.002    | 0.002    | 0        |
